# Supplementary material
Source: Royal Society of Chemistry journal article supplement (doi:10.1039/d6ta01806h)
Supplement: d6ta01806h1.pdf [file d6ta01806h1.pdf]

## **Supplementary material**

# **Surface-engineered Ni-Pt Alloys as Robust and Cost-effective Electrocatalysts for High-Performance Proton Exchange Membrane Water Electrolysis**

Kyeong-Rim Yeo<sup>a,b,1</sup>, Daehyun Kim<sup>b,1</sup>, Hoyoung Kim<sup>c</sup>, Sung Jong Yoo<sup>a</sup>, Jong Hyun Jang<sup>a</sup>, Haesun Park<sup>b,\*</sup>  
and Soo-Kil Kim<sup>b,\*</sup>

<sup>a</sup> Center for Hydrogen and Fuel Cells, Korea Institute of Science and Technology (KIST), 5 Hwarang-ro 14-gil, Seongbuk-gu, Seoul 02792, Republic of Korea

<sup>b</sup> School of Integrative Engineering, Chung-Ang University, 84 Heukseok-ro, Dongjak-gu, Seoul 06974, Republic of Korea

<sup>c</sup> Department of Advanced Materials Engineering, Chungbuk National University, 1 Chungdae-ro, Seowon-gu, Cheongju, Chungbuk 28644, Republic of Korea

<sup>1</sup> These authors contributed equally to this work.

\*Corresponding authors.

E-mail addresses: [sookilkim@cau.ac.kr](mailto:sookilkim@cau.ac.kr) (S.-K. Kim), [parkh@cau.ac.kr](mailto:parkh@cau.ac.kr) (H. Park),

**Table S1.** Electrodeposition conditions of the catalysts.

| Bulk atomic composition (EDX)                                                  | Electrolyte configuration / mM |                                  |                                |                    |     | Deposition potential / V <sub>SCE</sub> | Deposition time / min |
|--------------------------------------------------------------------------------|--------------------------------|----------------------------------|--------------------------------|--------------------|-----|-----------------------------------------|-----------------------|
|                                                                                | NiCl <sub>2</sub>              | H <sub>2</sub> PtCl <sub>6</sub> | H <sub>3</sub> BO <sub>3</sub> | NH <sub>4</sub> Cl | HCl |                                         |                       |
| Ni <sub>100</sub>                                                              | 50                             | 0                                |                                |                    |     |                                         |                       |
| Ni <sub>99.8</sub> Pt <sub>0.2</sub>                                           | 50                             | 0.25                             |                                |                    |     |                                         |                       |
| Ni <sub>99.5</sub> Pt <sub>0.5</sub>                                           | 50                             | 0.50                             | 300                            | 100                | 10  | -3.0                                    | 10                    |
| Ni <sub>98.7</sub> Pt <sub>1.3</sub> (P-Ni <sub>98.7</sub> Pt <sub>1.3</sub> ) | 50                             | 1.25                             |                                |                    |     |                                         |                       |
| Pt <sub>100</sub>                                                              | 0                              | 1.25                             |                                |                    |     |                                         |                       |

**Table S2.** Binding energies for Ni 2p<sub>3/2</sub> and Pt 4f XPS spectra for Ni<sub>100</sub>, Pt<sub>100</sub>, P-Ni<sub>98.7</sub>Pt<sub>1.3</sub>, and HT-Ni<sub>98.7</sub>Pt<sub>1.3</sub>.

| Sample                                  | Ni 2p <sub>3/2</sub> | Peak position / eV | Area ratio / % | Pt 4f            | Peak position / eV | Area ratio / % | Atomic ratio of Ni : Pt |
|-----------------------------------------|----------------------|--------------------|----------------|------------------|--------------------|----------------|-------------------------|
| Ni <sub>100</sub>                       | Ni metal             | 852.15             | 24.66          |                  |                    |                | 100 : 0                 |
|                                         | NiO                  | 853.27             | 7.87           |                  | -                  |                |                         |
|                                         | Ni(OH) <sub>2</sub>  | 855.40             | 67.47          |                  |                    |                |                         |
| Pt <sub>100</sub>                       |                      |                    |                | Pt               | 71.54<br>74.87     | 80.05          | 0 : 100                 |
|                                         |                      |                    |                | PtO              | 72.39<br>75.71     | 12.41          |                         |
|                                         |                      |                    |                | PtO <sub>2</sub> | 74.36<br>77.57     | 7.54           |                         |
| P-Ni <sub>98.7</sub> Pt <sub>1.3</sub>  | Ni metal             | 852.26             | 19.86          |                  |                    |                | 75.07 : 24:93           |
|                                         | NiO                  | 853.25             | 12.01          | Pt               | 71.15<br>74.50     | 100            |                         |
|                                         | Ni(OH) <sub>2</sub>  | 855.51             | 68.12          |                  |                    |                |                         |
| HT-Ni <sub>98.7</sub> Pt <sub>1.3</sub> | Ni metal             | 852.31             | 30.15          |                  |                    |                | 49.21 : 50.79           |
|                                         | NiO                  | 853.29             | 13.74          | Pt               | 71.09<br>74.44     | 100            |                         |
|                                         | Ni(OH) <sub>2</sub>  | 855.61             | 56.11          |                  |                    |                |                         |

**Table S3.** Comparison of PEMWE performance with Pt-based cathodes and IrO<sub>2</sub> anode.

| Membrane electrode assembly (MEA)                                       |            |                                                                   | Temperature<br>/ °C | Current density<br>/ A cm <sup>-2</sup> |         | Cell voltage<br>/ V <sub>cell</sub> |                        | Reference                                     |
|-------------------------------------------------------------------------|------------|-------------------------------------------------------------------|---------------------|-----------------------------------------|---------|-------------------------------------|------------------------|-----------------------------------------------|
| Cathode<br>(loading amount)                                             | Membrane   | Anode<br>(loading amount)                                         |                     | @ 1.7 V                                 | @ 2.0 V | @ 1 A cm <sup>-2</sup>              | @ 2 A cm <sup>-2</sup> |                                               |
| HT-Ni <sub>98.7</sub> Pt <sub>1.3</sub><br>(0.029 mg cm <sup>-2</sup> ) | Nafion 212 | Com. IrO <sub>x</sub><br>(2.0 mg <sub>Ir</sub> cm <sup>-2</sup> ) | 90                  | 0.783                                   | 2.731   | 1.748                               | 1.914                  | This work                                     |
| Pt/C<br>(0.1 mg <sub>Pt</sub> cm <sup>-2</sup> )                        | Nafion 212 | Com. IrO <sub>x</sub><br>(2.0 mg <sub>Ir</sub> cm <sup>-2</sup> ) | 90                  | 0.916                                   | 2.633   | 1.714                               | 1.883                  | This work                                     |
| Pt/C<br>(0.2 mg <sub>Pt</sub> cm <sup>-2</sup> )                        | Nafion 212 | Com. IrO <sub>x</sub><br>(2.5 mg <sub>Ir</sub> cm <sup>-2</sup> ) | 80                  | 1.024                                   | 2.267   | 1.698                               | 2.311                  | Journal of Power Sources<br>501 (2021) 230002 |
| PED Pt/CP<br>(0.051 mg <sub>Pt</sub> cm <sup>-2</sup> )                 | Nafion 212 | ED IrO <sub>2</sub> /CP<br>(0.1 mg cm <sup>-2</sup> )             | 90                  | 0.705                                   | 2.031   | 1.792                               | 1.994                  | Appl. Surf. Sci., 444 (2018)<br>303-311       |
| Pt/C<br>(0.04 mg <sub>Pt</sub> cm <sup>-2</sup> )                       | Nafion 212 | IrO <sub>2</sub> -CM<br>(0.5 mg <sub>Ir</sub> cm <sup>-2</sup> )  | 80                  | 0.758                                   | 1.593   | 1.806                               | 1.605                  | Material Today Energy<br>32 (2023) 101237     |
| PdPt <sub>ML</sub><br>(0.5 mg <sub>Pt</sub> cm <sup>-2</sup> )          | Nafion 212 | Com. IrO <sub>x</sub><br>(2.0 mg <sub>Ir</sub> cm <sup>-2</sup> ) | 80                  | 0.330                                   | 1.340   | 1.894                               | 2.163                  | Small, 20 (2024) 2406935                      |
| HEA-QDs/C<br>(0.2 mg <sub>Pt</sub> cm <sup>-2</sup> )                   | Nafion 212 | Com. IrO <sub>x</sub><br>(1.5 mg <sub>Ir</sub> cm <sup>-2</sup> ) | 65                  | 0.959                                   | -       | 1.701                               | 1.865                  | Energy Environ. Sci., 17 (2024),<br>6594      |

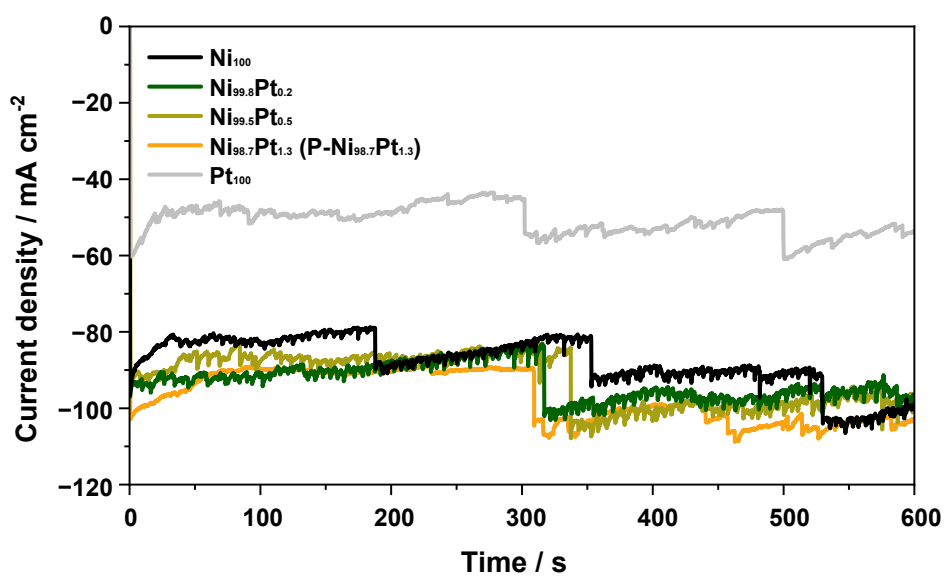

Figure S1. Potentiostatic electrodeposition i-t curve.

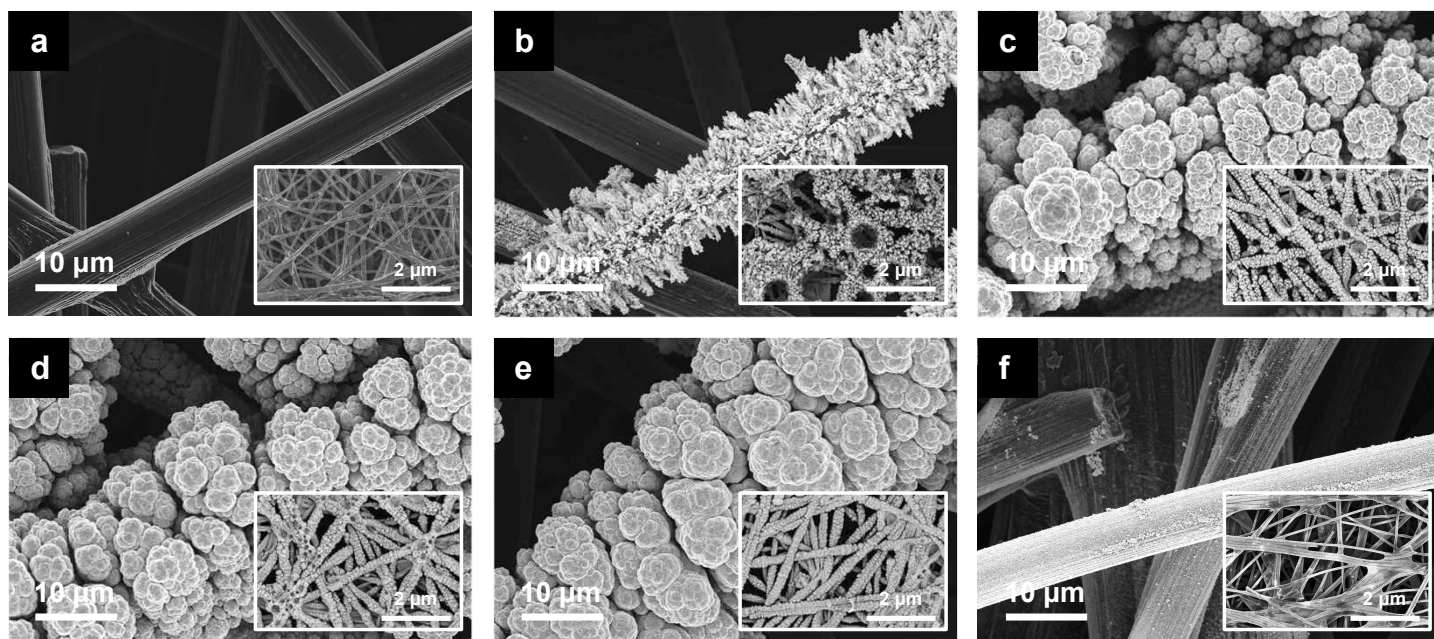

**Figure S2.** FE-SEM images of (a) bare carbon paper, (b) Ni<sub>100</sub>, (c) Ni<sub>99.7</sub>Pt<sub>0.3</sub>, (d) Ni<sub>98.9</sub>Pt<sub>0.5</sub>, (e) Ni<sub>98.7</sub>Pt<sub>1.3</sub>(P-Ni<sub>98.7</sub>Pt<sub>1.3</sub>), and (f) Pt<sub>100</sub> samples electrodeposited on carbon paper without heat-treatment. The insets show the FE-SEM images at lower magnification.

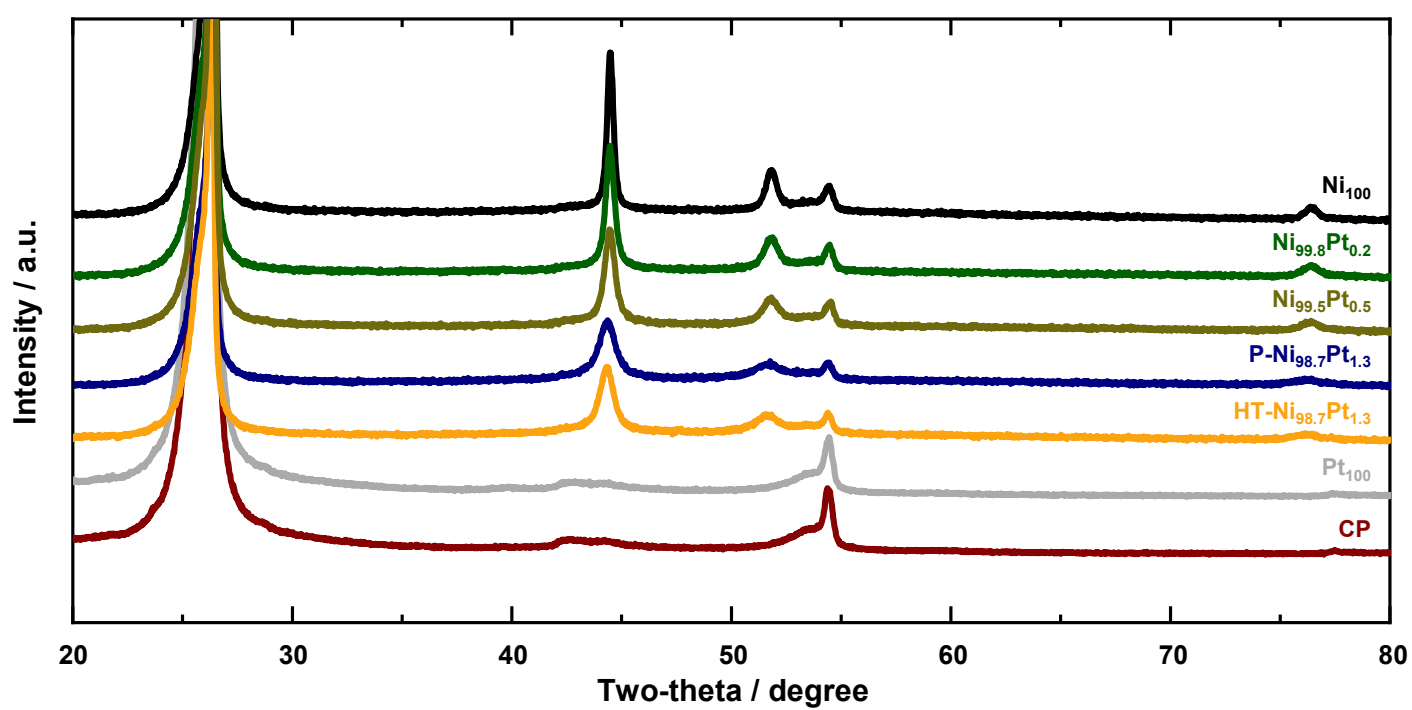

Figure S3. XRD patterns in the two-theta range of 20-80°.

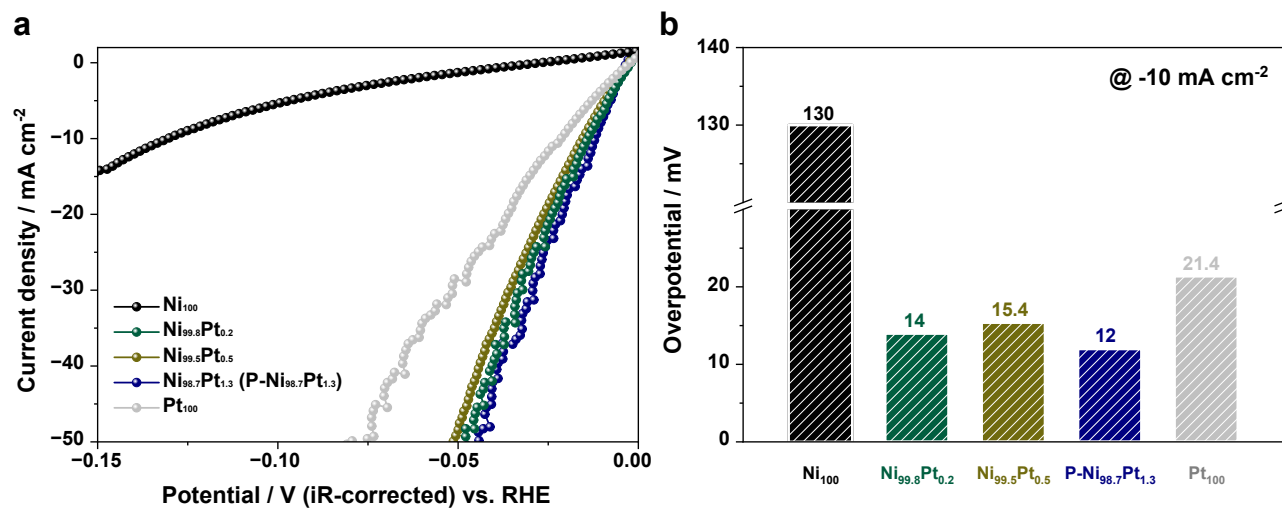

**Figure S4.** (a) HER polarization curves of Ni<sub>100</sub>, Ni<sub>99.8</sub>Pt<sub>0.2</sub>, Ni<sub>99.5</sub>Pt<sub>0.5</sub>, Ni<sub>98.7</sub>Pt<sub>1.3</sub> (P-Ni<sub>98.7</sub>Pt<sub>1.3</sub>), and Pt<sub>100</sub> samples. (b) Overpotential at -10 mA cm<sup>-2</sup> current density.

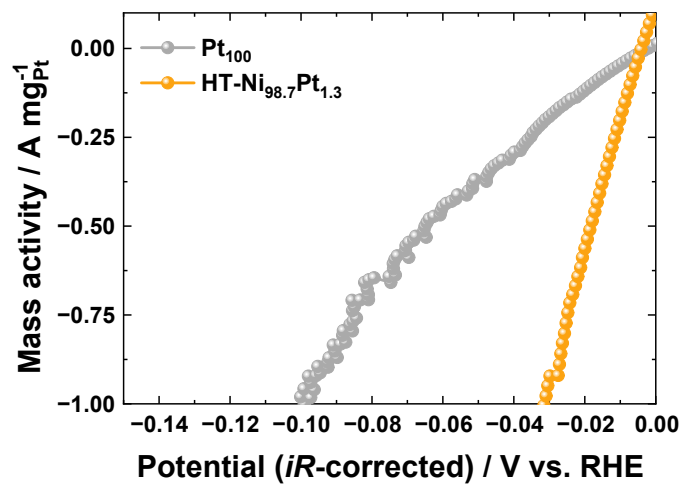

Figure S5. Mass activity normalized by Pt loading amounts.

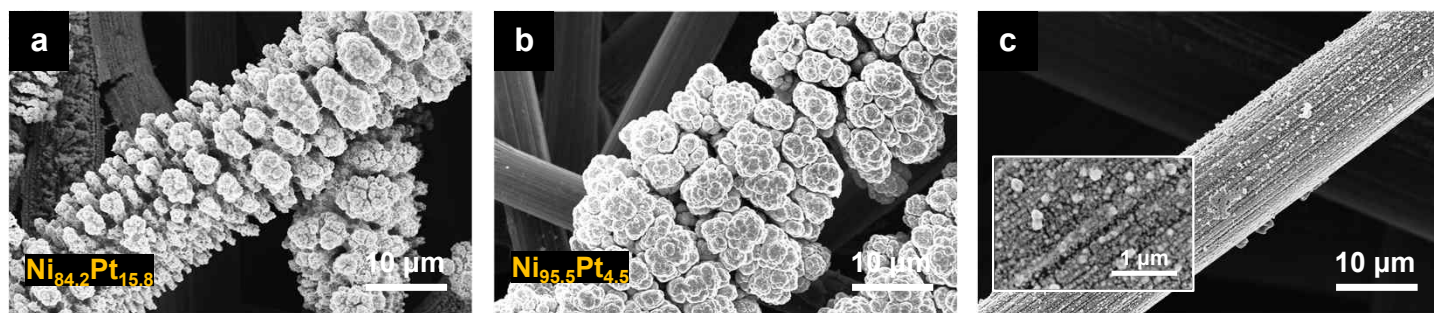

**Figure S6.** FE-SEM images after ADT 5000 cycles of (a) P-Ni<sub>98.7</sub>Pt<sub>1.3</sub>, (b) HT-Ni<sub>98.7</sub>Pt<sub>1.3</sub>, and (c) Pt<sub>100</sub>. The inset in c shows the FE-SEM image at higher magnification.

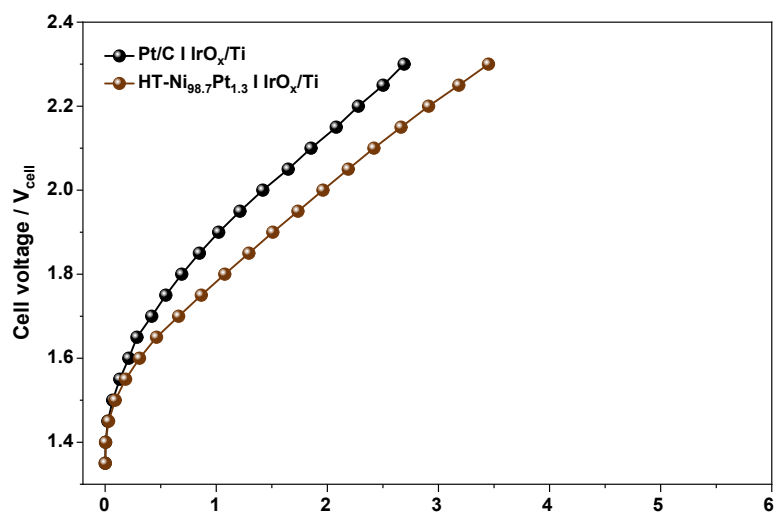

**Figure S7.** Single-cell polarization curves using HT-Ni<sub>98.7</sub>Pt<sub>1.3</sub> (0.029 mg of Pt per cm<sup>2</sup>)/CP cathode and IrO<sub>x</sub>/Ti anode. A commercial Pt/C cathode(0.1 mg of Pt per cm<sup>2</sup>) based PEMWE performance is compared.
